# Supplementary material
Source: Springer Nature journal article supplement (https://www.springermedizin.de/resource/supplementary/12916_2011_423_MOESM13_ESM.pdf/9599940)

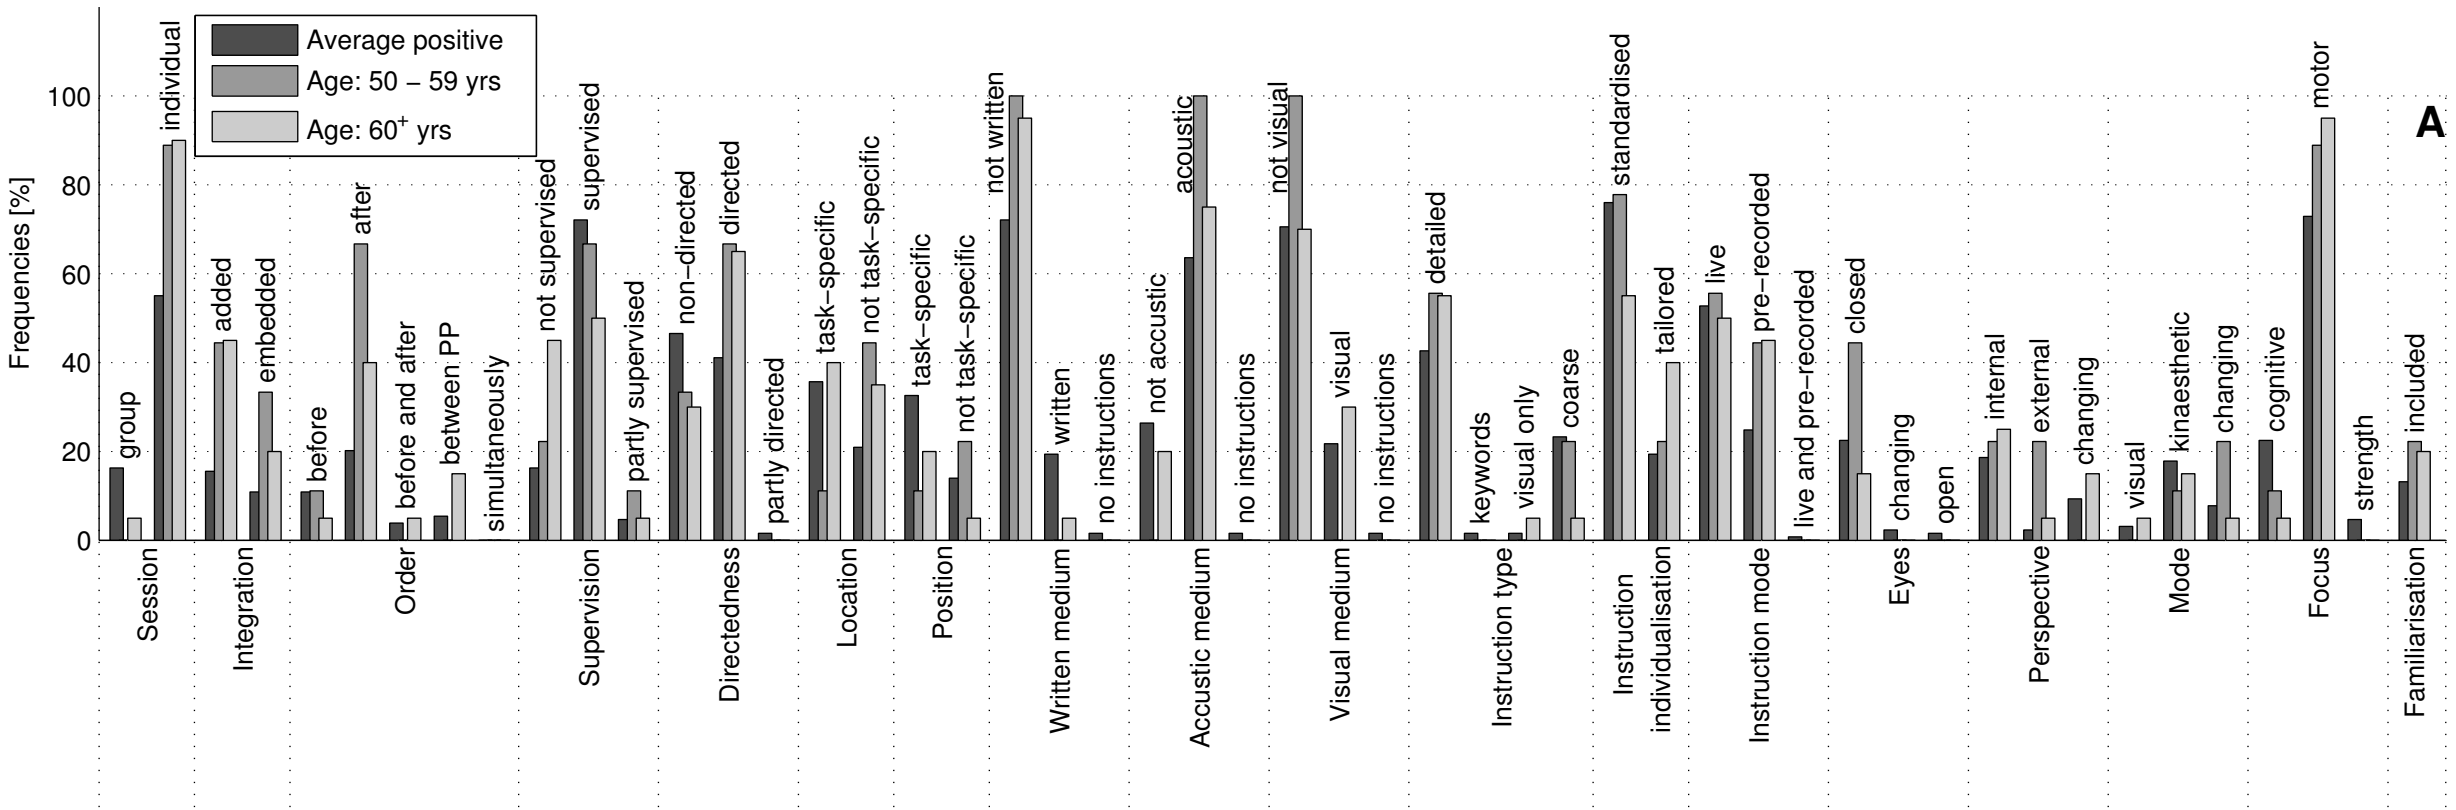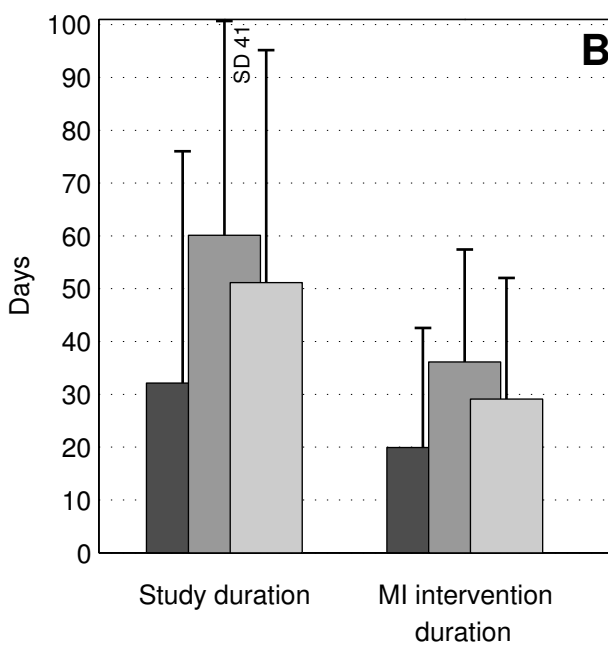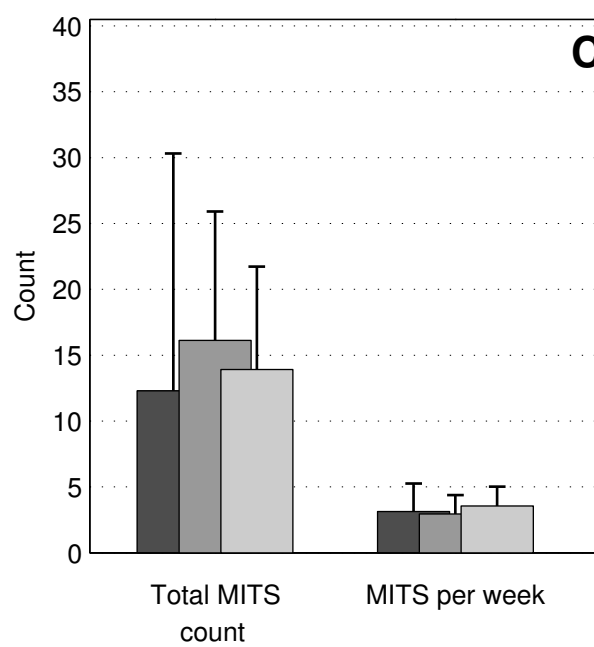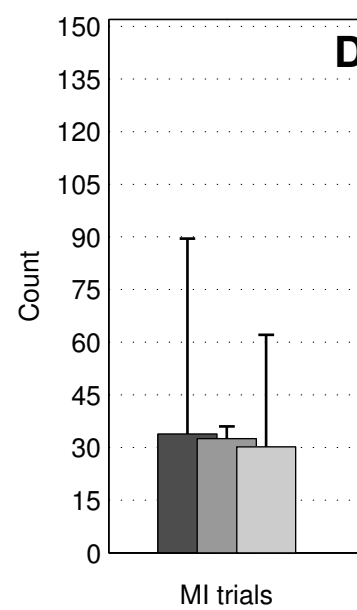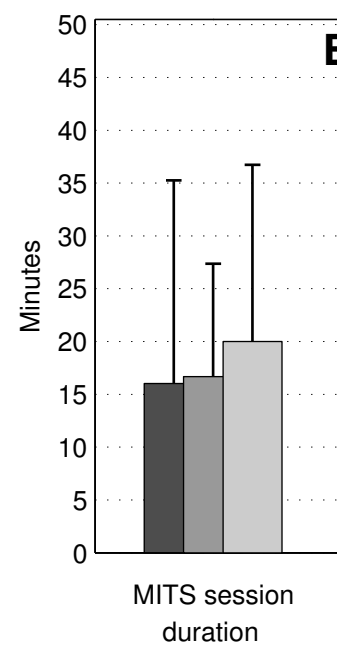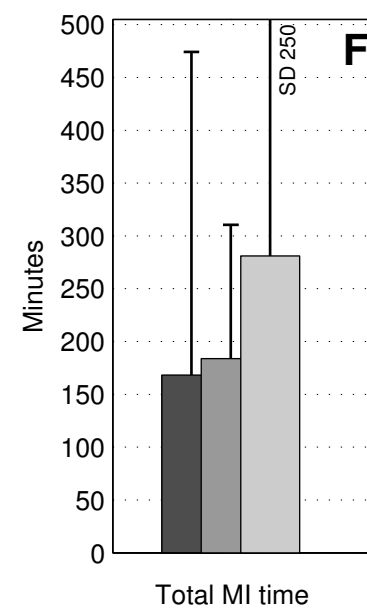

Supplement: MOESM13 [file 9599940]
